# Supplementary material
Source: PubMed Central journal article supplement (PMC4582965)

Supplementary Figure 1A

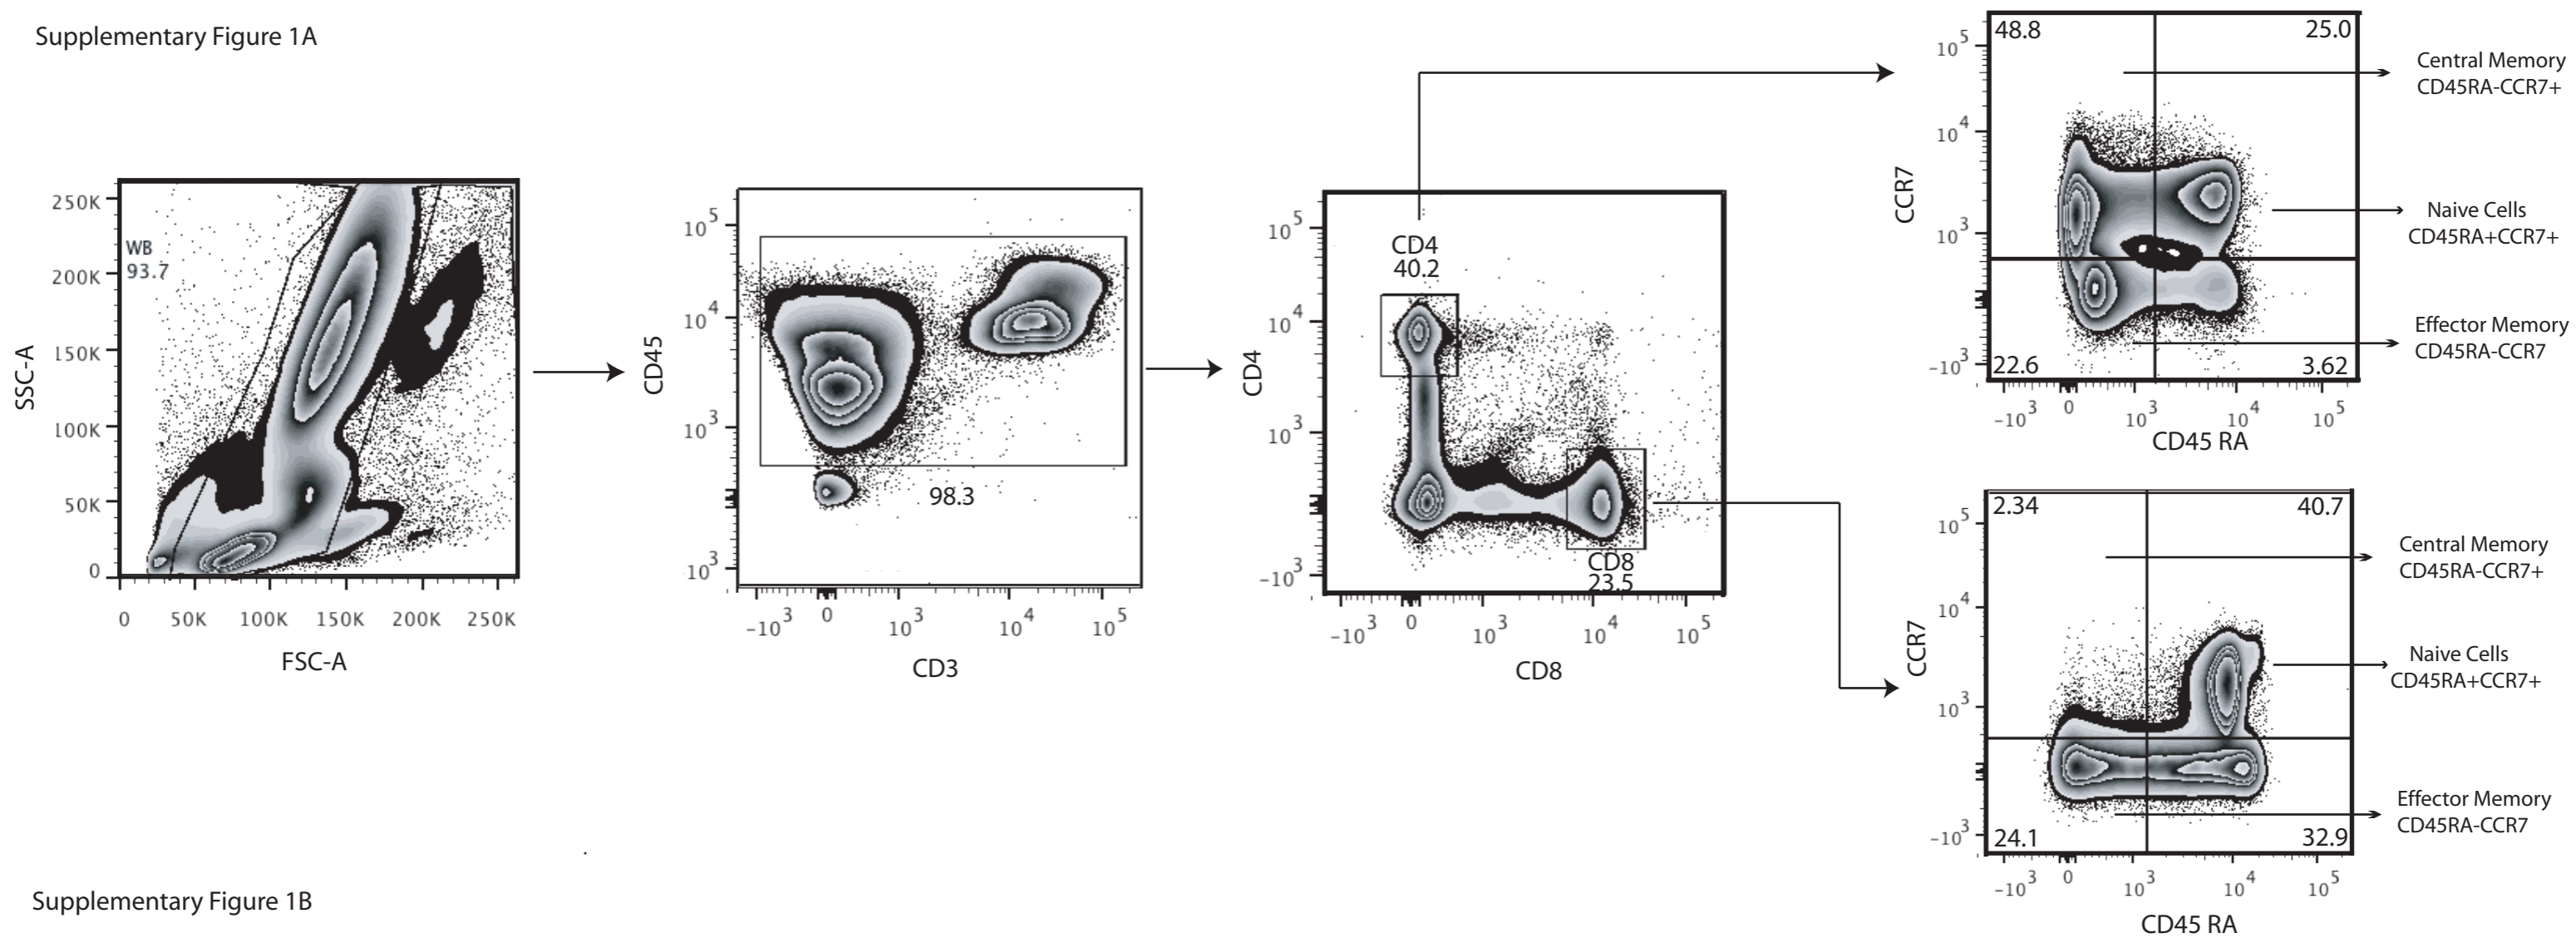

Supplementary Figure 1B

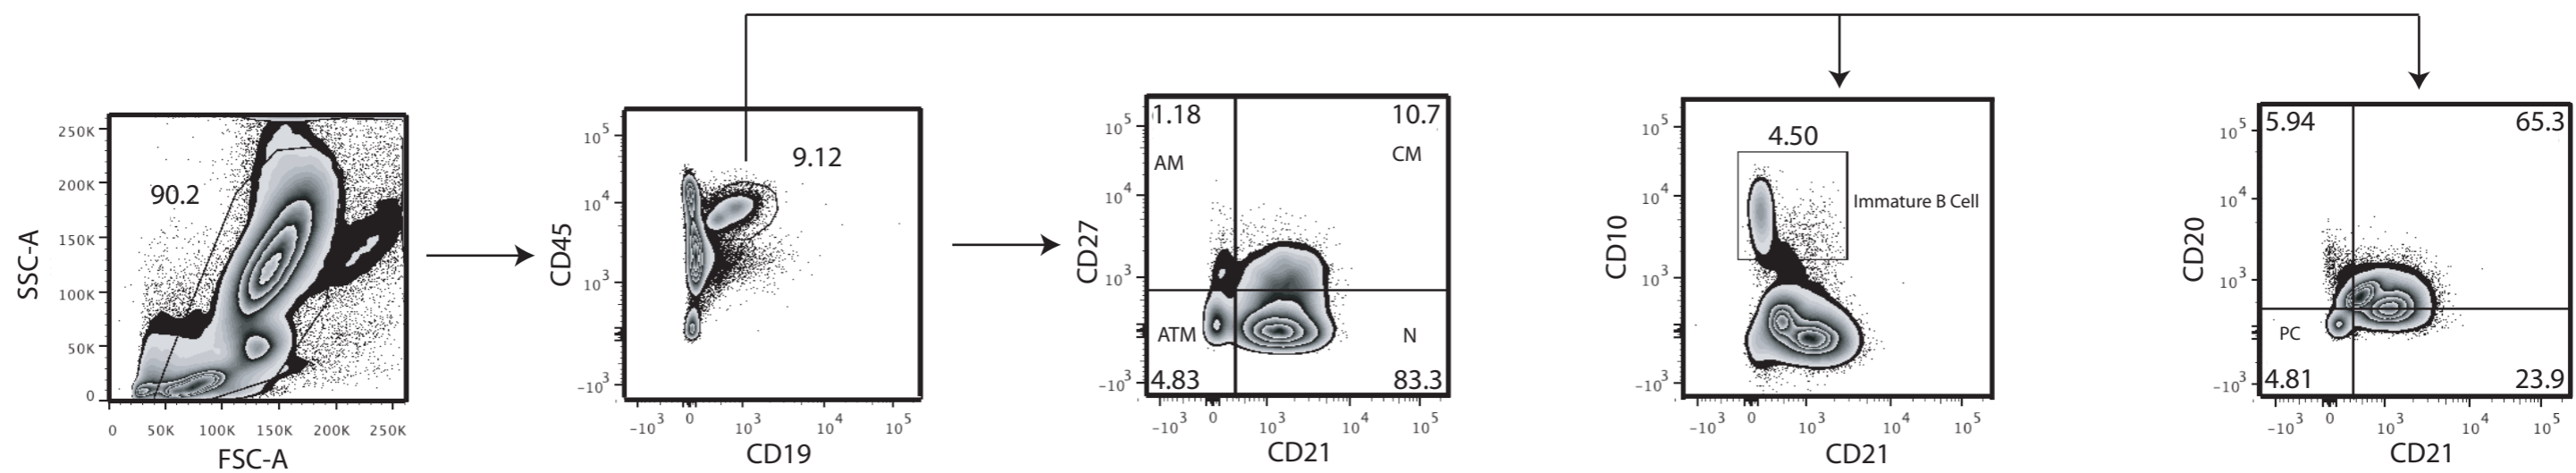

Supplementary Figure 1C

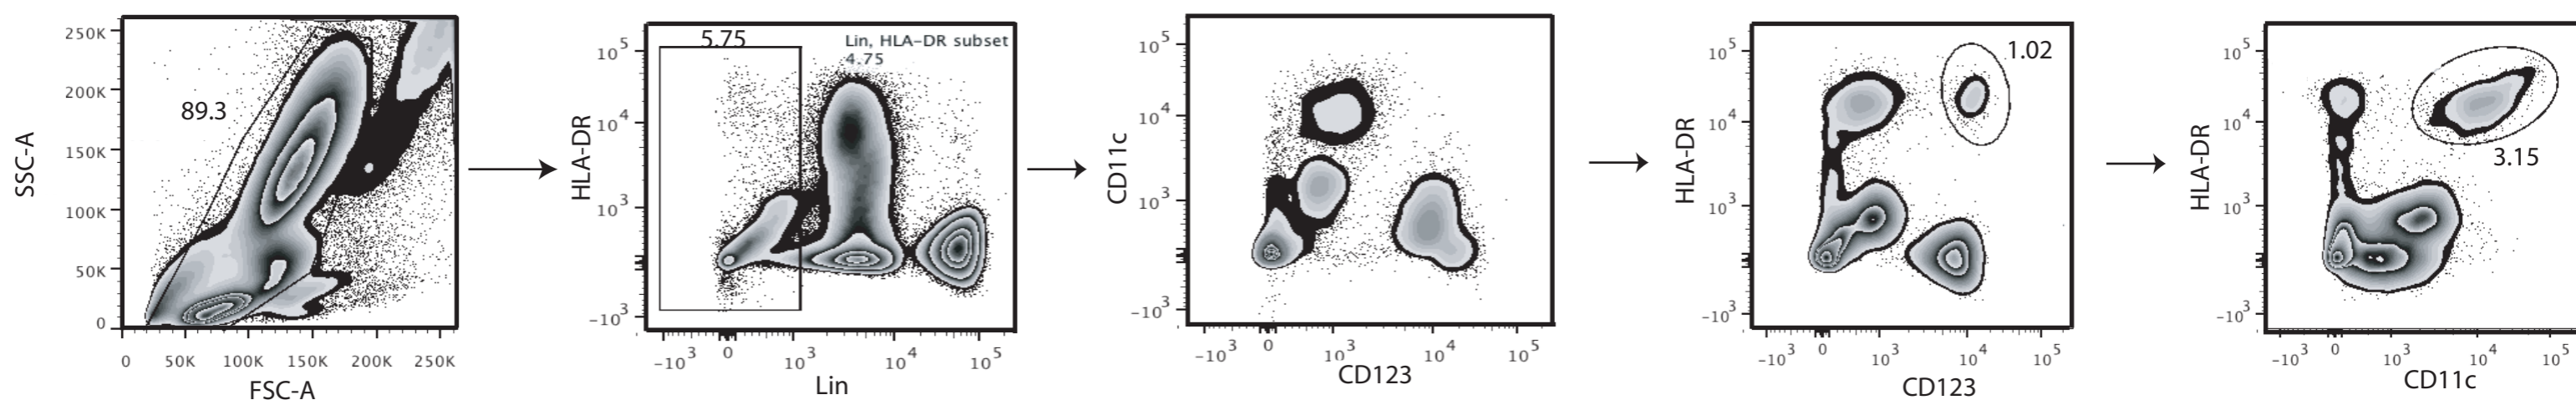

Supplementary Figure 1D

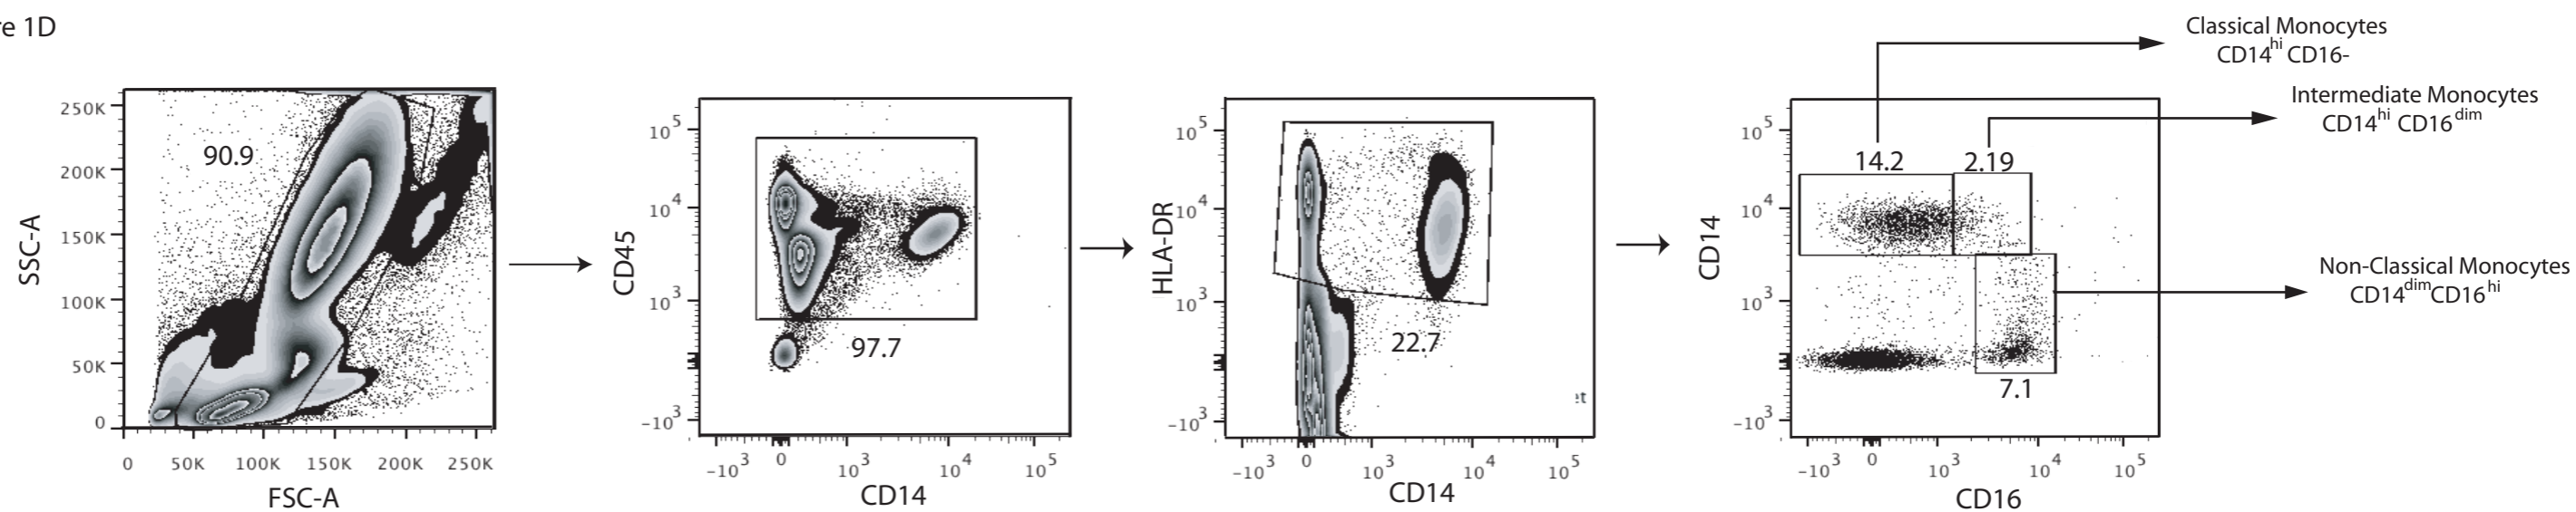

Supplement: imm0146-0243-sd1.pdf [file imm0146-0243-sd1.pdf]
